# Supplementary material for: Bioinformatics-based identification and validation of mitochondria-related genes associated with neonatal sepsis
Source: PeerJ. 2025 Dec 17;13:e20441. doi: 10.7717/peerj.20441 (PMC12717851; doi:10.7717/peerj.20441)
Supplement: Supplemental Information 4 [file peerj-13-20441-s004.xlsx]

## Sheet: miRNA_lncRNA1
miRAN	lncRNA
hsa-mir-1278	LINC01772
hsa-mir-1278	LINC01649
hsa-mir-1278	CRYZL2P-SEC16B
hsa-mir-1278	TTN-AS1
hsa-mir-1278	PTPRG-AS1
hsa-mir-1278	PSMD6-AS2
hsa-mir-1278	TNK2-AS1
hsa-mir-1278	HCG11
hsa-mir-1278	SNHG6
hsa-mir-1278	EBLN3P
hsa-mir-1297	GAS5
hsa-mir-1297	MIR181A1HG
hsa-mir-1297	LINC01703
hsa-mir-1297	THUMPD3-AS1
hsa-mir-1297	SH3BP5-AS1
hsa-mir-1297	DENND6A-DT
hsa-mir-1297	PSMD6-AS2
hsa-mir-1297	NNT-AS1
hsa-mir-1297	LINC00847
hsa-mir-1297	HCG11
hsa-mir-130a-5p	LAMTOR5-AS1
hsa-mir-130a-5p	GAS5
hsa-mir-130a-5p	DNAJC27-AS1
hsa-mir-130a-5p	LINC01122
hsa-mir-130a-5p	LINC01876
hsa-mir-130a-5p	TTN-AS1
hsa-mir-130a-5p	LINC01963
hsa-mir-130a-5p	THUMPD3-AS1
hsa-mir-130a-5p	THUMPD3-AS1
hsa-mir-130a-5p	THRB-IT1
hsa-mir-132-3p	LINC01359
hsa-mir-132-3p	MIR137HG
hsa-mir-132-3p	LINC00538
hsa-mir-132-3p	STARD7-AS1
hsa-mir-132-3p	SH3BP5-AS1
hsa-mir-132-3p	ZBTB20-AS1
hsa-mir-132-3p	MBNL1-AS1
hsa-mir-132-3p	LPP-AS2
hsa-mir-132-3p	HCG18
hsa-mir-132-3p	SNHG5
hsa-mir-133b	FGD5-AS1
hsa-mir-133b	LINC01995
hsa-mir-133b	NOP14-AS1
hsa-mir-133b	LINC02432
hsa-mir-133b	LINC00847
hsa-mir-133b	HCG18
hsa-mir-133b	LINC02538
hsa-mir-133b	ZEB1-AS1
hsa-mir-133b	KCNMA1-AS1
hsa-mir-133b	AGAP11
hsa-mir-134-5p	PINK1-AS
hsa-mir-134-5p	ERI3-IT1
hsa-mir-134-5p	LINC01771
hsa-mir-134-5p	LINC01359
hsa-mir-134-5p	LAMTOR5-AS1
hsa-mir-134-5p	SLC16A1-AS1
hsa-mir-134-5p	ADAMTSL4-AS1
hsa-mir-134-5p	TDRKH-AS1
hsa-mir-134-5p	DNM3OS
hsa-mir-134-5p	CRYZL2P-SEC16B
hsa-mir-150-5p	LINC01128
hsa-mir-150-5p	PINK1-AS
hsa-mir-150-5p	FOXD2-AS1
hsa-mir-150-5p	IL6R-AS1
hsa-mir-150-5p	RN7SL832P
hsa-mir-150-5p	LINC01121
hsa-mir-150-5p	LINC01798
hsa-mir-150-5p	BOLA3-AS1
hsa-mir-150-5p	PAX8-AS1
hsa-mir-150-5p	EIF1B-AS1
hsa-mir-18a-5p	LINC00622
hsa-mir-18a-5p	GAS5
hsa-mir-18a-5p	LINC00467
hsa-mir-18a-5p	SEPSECS-AS1
hsa-mir-18a-5p	LINC00847
hsa-mir-18a-5p	LINC00847
hsa-mir-18a-5p	SNHG15
hsa-mir-18a-5p	MSC-AS1
hsa-mir-18a-5p	ZFPM2-AS1
hsa-mir-18a-5p	FER1L6-AS2
hsa-mir-18b-5p	LINC00622
hsa-mir-18b-5p	GAS5
hsa-mir-18b-5p	LINC00467
hsa-mir-18b-5p	SEPSECS-AS1
hsa-mir-18b-5p	LINC00847
hsa-mir-18b-5p	LINC00847
hsa-mir-18b-5p	LINC00847
hsa-mir-18b-5p	SNHG15
hsa-mir-18b-5p	MSC-AS1
hsa-mir-18b-5p	ZFPM2-AS1
hsa-mir-1911-5p	LBX2-AS1
hsa-mir-1911-5p	PAX8-AS1
hsa-mir-1911-5p	TTN-AS1
hsa-mir-1911-5p	EXOC3-AS1
hsa-mir-1911-5p	LINC01011
hsa-mir-1911-5p	HMGN3-AS1
hsa-mir-1911-5p	LINC00963
hsa-mir-1911-5p	CD81-AS1
hsa-mir-1911-5p	NEAT1
hsa-mir-1911-5p	TMPO-AS1
hsa-mir-202-5p	SH3BP5-AS1
hsa-mir-202-5p	HCG11
hsa-mir-202-5p	HCG11
hsa-mir-202-5p	HCG11
hsa-mir-202-5p	HCG11
hsa-mir-202-5p	LINC00174
hsa-mir-202-5p	UBR5-AS1
hsa-mir-202-5p	PEG13
hsa-mir-202-5p	EBLN3P
hsa-mir-202-5p	EBLN3P
hsa-mir-205-5p	LINC01355
hsa-mir-205-5p	GAS5
hsa-mir-205-5p	MIR181A1HG
hsa-mir-205-5p	LINC01703
hsa-mir-205-5p	PCBP1-AS1
hsa-mir-205-5p	PCBP1-AS1
hsa-mir-205-5p	CYTOR
hsa-mir-205-5p	CYTOR
hsa-mir-205-5p	MIR4435-2HG
hsa-mir-205-5p	PAX8-AS1
hsa-mir-21-5p	LINC00852
hsa-mir-21-5p	LINC01184
hsa-mir-21-5p	FAM66E
hsa-mir-21-5p	MSC-AS1
hsa-mir-21-5p	OTUD6B-AS1
hsa-mir-21-5p	PVT1
hsa-mir-21-5p	FAM201A
hsa-mir-21-5p	ZEB1-AS1
hsa-mir-21-5p	SGMS1-AS1
hsa-mir-21-5p	NUTM2A-AS1
hsa-mir-210-3p	LINC01355
hsa-mir-210-3p	LAMTOR5-AS1
hsa-mir-210-3p	LINC01743
hsa-mir-210-3p	SGO1-AS1
hsa-mir-210-3p	LINC01011
hsa-mir-210-3p	LINC00473
hsa-mir-210-3p	PSMG3-AS1
hsa-mir-210-3p	PAXIP1-AS1
hsa-mir-210-3p	KCNQ1OT1
hsa-mir-210-3p	SCARNA9
hsa-mir-2116-3p	SLFNL1-AS1
hsa-mir-2116-3p	GAS5
hsa-mir-2116-3p	MIR4435-2HG
hsa-mir-2116-3p	PAX8-AS1
hsa-mir-2116-3p	NIFK-AS1
hsa-mir-2116-3p	LINC01963
hsa-mir-2116-3p	THUMPD3-AS1
hsa-mir-2116-3p	H1FX-AS1
hsa-mir-2116-3p	MBNL1-AS1
hsa-mir-2116-3p	LPP-AS2
hsa-mir-212-3p	LINC01359
hsa-mir-212-3p	MIR137HG
hsa-mir-212-3p	LINC00538
hsa-mir-212-3p	STARD7-AS1
hsa-mir-212-3p	SH3BP5-AS1
hsa-mir-212-3p	ZBTB20-AS1
hsa-mir-212-3p	MBNL1-AS1
hsa-mir-212-3p	LPP-AS2
hsa-mir-212-3p	HCG18
hsa-mir-212-3p	SNHG5
hsa-mir-214-3p	LINC01128
hsa-mir-214-3p	TNFRSF14-AS1
hsa-mir-214-3p	SNHG3
hsa-mir-214-3p	SNHG3
hsa-mir-214-3p	SLFNL1-AS1
hsa-mir-214-3p	LINC01725
hsa-mir-214-3p	ADAMTSL4-AS1
hsa-mir-214-3p	ADAMTSL4-AS1
hsa-mir-214-3p	RUSC1-AS1
hsa-mir-214-3p	MIR29B2CHG
hsa-mir-22-3p	AP4B1-AS1
hsa-mir-22-3p	CRYZL2P-SEC16B
hsa-mir-22-3p	DNAJC27-AS1
hsa-mir-22-3p	MIR4435-2HG
hsa-mir-22-3p	PAX8-AS1
hsa-mir-22-3p	AGAP1-IT1
hsa-mir-22-3p	FGD5-AS1
hsa-mir-22-3p	CLRN1-AS1
hsa-mir-22-3p	LINC02012
hsa-mir-22-3p	LINC02438
hsa-mir-2467-3p	LINC01714
hsa-mir-2467-3p	LINC01772
hsa-mir-2467-3p	SNHG3
hsa-mir-2467-3p	SNHG3
hsa-mir-2467-3p	SNHG12
hsa-mir-2467-3p	SNHG12
hsa-mir-2467-3p	SLFNL1-AS1
hsa-mir-2467-3p	SLFNL1-AS1
hsa-mir-2467-3p	MIR137HG
hsa-mir-2467-3p	DCST1-AS1
hsa-mir-2682-5p	SNHG3
hsa-mir-2682-5p	SLFNL1-AS1
hsa-mir-2682-5p	GAS5
hsa-mir-2682-5p	MIR29B2CHG
hsa-mir-2682-5p	LINC01963
hsa-mir-2682-5p	EIF1B-AS1
hsa-mir-2682-5p	FOXP1-IT1
hsa-mir-2682-5p	MYLK-AS1
hsa-mir-2682-5p	WDFY3-AS2
hsa-mir-2682-5p	SNHG8
hsa-mir-26a-5p	GAS5
hsa-mir-26a-5p	MIR181A1HG
hsa-mir-26a-5p	LINC01703
hsa-mir-26a-5p	THUMPD3-AS1
hsa-mir-26a-5p	SH3BP5-AS1
hsa-mir-26a-5p	DENND6A-DT
hsa-mir-26a-5p	PSMD6-AS2
hsa-mir-26a-5p	NNT-AS1
hsa-mir-26a-5p	LINC00847
hsa-mir-26a-5p	HCG11
hsa-mir-26b-5p	GAS5
hsa-mir-26b-5p	MIR181A1HG
hsa-mir-26b-5p	LINC01703
hsa-mir-26b-5p	THUMPD3-AS1
hsa-mir-26b-5p	SH3BP5-AS1
hsa-mir-26b-5p	DENND6A-DT
hsa-mir-26b-5p	PSMD6-AS2
hsa-mir-26b-5p	NNT-AS1
hsa-mir-26b-5p	LINC00847
hsa-mir-26b-5p	HCG11
hsa-mir-30a-5p	LINC01355
hsa-mir-30a-5p	LINC01133
hsa-mir-30a-5p	LINC01139
hsa-mir-30a-5p	PAX8-AS1
hsa-mir-30a-5p	ACAP2-IT1
hsa-mir-30a-5p	NOP14-AS1
hsa-mir-30a-5p	LIFR-AS1
hsa-mir-30a-5p	EPB41L4A-AS1
hsa-mir-30a-5p	HCG18
hsa-mir-30a-5p	HCG18
hsa-mir-30b-5p	LINC01355
hsa-mir-30b-5p	LINC01133
hsa-mir-30b-5p	LINC01139
hsa-mir-30b-5p	PAX8-AS1
hsa-mir-30b-5p	ACAP2-IT1
hsa-mir-30b-5p	NOP14-AS1
hsa-mir-30b-5p	LIFR-AS1
hsa-mir-30b-5p	EPB41L4A-AS1
hsa-mir-30b-5p	HCG18
hsa-mir-30b-5p	HCG18
hsa-mir-30c-5p	LINC01355
hsa-mir-30c-5p	LINC01133
hsa-mir-30c-5p	LINC01139
hsa-mir-30c-5p	PAX8-AS1
hsa-mir-30c-5p	ACAP2-IT1
hsa-mir-30c-5p	NOP14-AS1
hsa-mir-30c-5p	LIFR-AS1
hsa-mir-30c-5p	EPB41L4A-AS1
hsa-mir-30c-5p	HCG18
hsa-mir-30c-5p	HCG18
hsa-mir-30d-5p	LINC01355
hsa-mir-30d-5p	LINC01133
hsa-mir-30d-5p	LINC01139
hsa-mir-30d-5p	PAX8-AS1
hsa-mir-30d-5p	ACAP2-IT1
hsa-mir-30d-5p	NOP14-AS1
hsa-mir-30d-5p	LIFR-AS1
hsa-mir-30d-5p	EPB41L4A-AS1
hsa-mir-30d-5p	HCG18
hsa-mir-30d-5p	HCG18
hsa-mir-30e-5p	LINC01355
hsa-mir-30e-5p	LINC01133
hsa-mir-30e-5p	LINC01139
hsa-mir-30e-5p	PAX8-AS1
hsa-mir-30e-5p	ACAP2-IT1
hsa-mir-30e-5p	NOP14-AS1
hsa-mir-30e-5p	LIFR-AS1
hsa-mir-30e-5p	EPB41L4A-AS1
hsa-mir-30e-5p	HCG18
hsa-mir-30e-5p	HCG18
hsa-mir-3118	PINK1-AS
hsa-mir-3118	ERI3-IT1
hsa-mir-3118	LINC01771
hsa-mir-3118	LINC01359
hsa-mir-3118	LAMTOR5-AS1
hsa-mir-3118	SLC16A1-AS1
hsa-mir-3118	ADAMTSL4-AS1
hsa-mir-3118	TDRKH-AS1
hsa-mir-3118	DNM3OS
hsa-mir-3118	CRYZL2P-SEC16B
hsa-mir-3150a-3p	LINC01128
hsa-mir-3150a-3p	LINC01725
hsa-mir-3150a-3p	MIR137HG
hsa-mir-3150a-3p	MIR181A1HG
hsa-mir-3150a-3p	IPO9-AS1
hsa-mir-3150a-3p	MIR29B2CHG
hsa-mir-3150a-3p	DNAJC27-AS1
hsa-mir-3150a-3p	LBX2-AS1
hsa-mir-3150a-3p	LBX2-AS1
hsa-mir-3150a-3p	PAX8-AS1
hsa-mir-3163	LINC01355
hsa-mir-3163	HIPK1-AS1
hsa-mir-3163	MIR181A1HG
hsa-mir-3163	LINC01876
hsa-mir-3163	LINC01963
hsa-mir-3163	THUMPD3-AS1
hsa-mir-3163	THUMPD3-AS1
hsa-mir-3163	THUMPD3-AS1
hsa-mir-3163	FGD5-AS1
hsa-mir-3163	FGD5-AS1
hsa-mir-3194-3p	NPPA-AS1
hsa-mir-3194-3p	PINK1-AS
hsa-mir-3194-3p	LINC01355
hsa-mir-3194-3p	MATN1-AS1
hsa-mir-3194-3p	FOXD2-AS1
hsa-mir-3194-3p	LAMTOR5-AS1
hsa-mir-3194-3p	LAMTOR5-AS1
hsa-mir-3194-3p	LAMTOR5-AS1
hsa-mir-3194-3p	LAMTOR5-AS1
hsa-mir-3194-3p	RUSC1-AS1
hsa-mir-32-5p	LINC01128
hsa-mir-32-5p	MDS2
hsa-mir-32-5p	LINC00467
hsa-mir-32-5p	PAX8-AS1
hsa-mir-32-5p	WWTR1-IT1
hsa-mir-32-5p	PURPL
hsa-mir-32-5p	PURPL
hsa-mir-32-5p	NR2F1-AS1
hsa-mir-32-5p	MIR3936HG
hsa-mir-32-5p	SNHG4
hsa-mir-320b	SNHG12
hsa-mir-320b	GAS5
hsa-mir-320b	ALMS1-IT1
hsa-mir-320b	BOLA3-AS1
hsa-mir-320b	PAX8-AS1
hsa-mir-320b	PAX8-AS1
hsa-mir-320b	TTN-AS1
hsa-mir-320b	THUMPD3-AS1
hsa-mir-320b	FGD5-AS1
hsa-mir-320b	EIF1B-AS1
hsa-mir-320c	SNHG12
hsa-mir-320c	GAS5
hsa-mir-320c	ALMS1-IT1
hsa-mir-320c	BOLA3-AS1
hsa-mir-320c	PAX8-AS1
hsa-mir-320c	PAX8-AS1
hsa-mir-320c	TTN-AS1
hsa-mir-320c	THUMPD3-AS1
hsa-mir-320c	FGD5-AS1
hsa-mir-320c	EIF1B-AS1
hsa-mir-320d	SNHG12
hsa-mir-320d	GAS5
hsa-mir-320d	ALMS1-IT1
hsa-mir-320d	BOLA3-AS1
hsa-mir-320d	PAX8-AS1
hsa-mir-320d	PAX8-AS1
hsa-mir-320d	TTN-AS1
hsa-mir-320d	THUMPD3-AS1
hsa-mir-320d	FGD5-AS1
hsa-mir-320d	EIF1B-AS1
hsa-mir-323a-3p	TTN-AS1
hsa-mir-323a-3p	FGD5-AS1
hsa-mir-323a-3p	THRB-IT1
hsa-mir-323a-3p	PTPRG-AS1
hsa-mir-323a-3p	DUBR
hsa-mir-323a-3p	LINC02035
hsa-mir-323a-3p	LINC01091
hsa-mir-323a-3p	LINC01184
hsa-mir-323a-3p	LINC01012
hsa-mir-323a-3p	HCP5
hsa-mir-326	TNFRSF14-AS1
hsa-mir-326	ZBTB40-IT1
hsa-mir-326	SNHG3
hsa-mir-326	SNHG12
hsa-mir-326	SLFNL1-AS1
hsa-mir-326	RUSC1-AS1
hsa-mir-326	RUSC1-AS1
hsa-mir-326	PCAT6
hsa-mir-326	MIR29B2CHG
hsa-mir-326	DNAJC27-AS1
hsa-mir-330-5p	TNFRSF14-AS1
hsa-mir-330-5p	ZBTB40-IT1
hsa-mir-330-5p	SNHG3
hsa-mir-330-5p	SNHG12
hsa-mir-330-5p	SNHG12
hsa-mir-330-5p	SLFNL1-AS1
hsa-mir-330-5p	RUSC1-AS1
hsa-mir-330-5p	RUSC1-AS1
hsa-mir-330-5p	PCAT6
hsa-mir-330-5p	MIR29B2CHG
hsa-mir-34a-5p	LINC01715
hsa-mir-34a-5p	SLFNL1-AS1
hsa-mir-34a-5p	MIR29B2CHG
hsa-mir-34a-5p	LINC01641
hsa-mir-34a-5p	LINC01132
hsa-mir-34a-5p	PCBP1-AS1
hsa-mir-34a-5p	LINC01816
hsa-mir-34a-5p	LINC01123
hsa-mir-34a-5p	LINC01106
hsa-mir-34a-5p	LINC02035
hsa-mir-34b-5p	SNHG3
hsa-mir-34b-5p	SLFNL1-AS1
hsa-mir-34b-5p	GAS5
hsa-mir-34b-5p	MIR29B2CHG
hsa-mir-34b-5p	LINC01963
hsa-mir-34b-5p	EIF1B-AS1
hsa-mir-34b-5p	FOXP1-IT1
hsa-mir-34b-5p	MYLK-AS1
hsa-mir-34b-5p	WDFY3-AS2
hsa-mir-34b-5p	SNHG8
hsa-mir-34c-5p	LINC01715
hsa-mir-34c-5p	SLFNL1-AS1
hsa-mir-34c-5p	MIR29B2CHG
hsa-mir-34c-5p	LINC01641
hsa-mir-34c-5p	LINC01132
hsa-mir-34c-5p	PCBP1-AS1
hsa-mir-34c-5p	LINC01816
hsa-mir-34c-5p	LINC01123
hsa-mir-34c-5p	LINC01106
hsa-mir-34c-5p	LINC02035
hsa-mir-3611	LINC01772
hsa-mir-3611	ADAMTSL4-AS1
hsa-mir-3611	CRYZL2P-SEC16B
hsa-mir-3611	ID2-AS1
hsa-mir-3611	PCBP1-AS1
hsa-mir-3611	CYTOR
hsa-mir-3611	MIR4435-2HG
hsa-mir-3611	LINC01806
hsa-mir-3611	THUMPD3-AS1
hsa-mir-3611	FGD5-AS1
hsa-mir-3619-5p	LINC01128
hsa-mir-3619-5p	TNFRSF14-AS1
hsa-mir-3619-5p	SNHG3
hsa-mir-3619-5p	SNHG3
hsa-mir-3619-5p	SLFNL1-AS1
hsa-mir-3619-5p	ADAMTSL4-AS1
hsa-mir-3619-5p	ADAMTSL4-AS1
hsa-mir-3619-5p	RUSC1-AS1
hsa-mir-3619-5p	MIR29B2CHG
hsa-mir-3619-5p	LINC01703
hsa-mir-3622b-5p	LINC01226
hsa-mir-3622b-5p	LINC01719
hsa-mir-3622b-5p	GAS5
hsa-mir-3622b-5p	GAS5
hsa-mir-3622b-5p	LINC01641
hsa-mir-3622b-5p	ID2-AS1
hsa-mir-3622b-5p	FGD5-AS1
hsa-mir-3622b-5p	MYLK-AS1
hsa-mir-3622b-5p	MUC20-OT1
hsa-mir-3622b-5p	NOP14-AS1
hsa-mir-363-3p	LINC01128
hsa-mir-363-3p	MDS2
hsa-mir-363-3p	LINC00467
hsa-mir-363-3p	C1orf143
hsa-mir-363-3p	PAX8-AS1
hsa-mir-363-3p	WWTR1-IT1
hsa-mir-363-3p	PURPL
hsa-mir-363-3p	PURPL
hsa-mir-363-3p	NR2F1-AS1
hsa-mir-363-3p	MIR3936HG
hsa-mir-367-3p	LINC01128
hsa-mir-367-3p	MDS2
hsa-mir-367-3p	LINC00467
hsa-mir-367-3p	PAX8-AS1
hsa-mir-367-3p	WWTR1-IT1
hsa-mir-367-3p	PURPL
hsa-mir-367-3p	PURPL
hsa-mir-367-3p	NR2F1-AS1
hsa-mir-367-3p	MIR3936HG
hsa-mir-367-3p	SNHG4
hsa-mir-371a-5p	SNHG3
hsa-mir-371a-5p	CCDC18-AS1
hsa-mir-371a-5p	ADAMTSL4-AS1
hsa-mir-371a-5p	RASAL2-AS1
hsa-mir-371a-5p	MIR29B2CHG
hsa-mir-371a-5p	MIR4435-2HG
hsa-mir-371a-5p	EHHADH-AS1
hsa-mir-371a-5p	SNHG8
hsa-mir-371a-5p	LINC02434
hsa-mir-371a-5p	NNT-AS1
hsa-mir-376a-3p	LINC01703
hsa-mir-376a-3p	CYTOR
hsa-mir-376a-3p	MIR4435-2HG
hsa-mir-376a-3p	LINC02478
hsa-mir-376a-3p	LINC01806
hsa-mir-376a-3p	TTN-AS1
hsa-mir-376a-3p	SH3BP5-AS1
hsa-mir-376a-3p	LINC00488
hsa-mir-376a-3p	NOP14-AS1
hsa-mir-376a-3p	UGDH-AS1
hsa-mir-376b-3p	LINC01703
hsa-mir-376b-3p	CYTOR
hsa-mir-376b-3p	MIR4435-2HG
hsa-mir-376b-3p	LINC02478
hsa-mir-376b-3p	LINC01806
hsa-mir-376b-3p	TTN-AS1
hsa-mir-376b-3p	SH3BP5-AS1
hsa-mir-376b-3p	LINC00488
hsa-mir-376b-3p	NOP14-AS1
hsa-mir-376b-3p	UGDH-AS1
hsa-mir-410-3p	SNHG3
hsa-mir-410-3p	LINC01963
hsa-mir-410-3p	MAGI1-IT1
hsa-mir-410-3p	TMEM161B-AS1
hsa-mir-410-3p	CASC19
hsa-mir-410-3p	EBLN3P
hsa-mir-410-3p	RPARP-AS1
hsa-mir-410-3p	KCNQ1OT1
hsa-mir-410-3p	KCNQ1OT1
hsa-mir-410-3p	NEAT1
hsa-mir-425-5p	LINC01806
hsa-mir-425-5p	LINC00608
hsa-mir-425-5p	THUMPD3-AS1
hsa-mir-425-5p	SNHG8
hsa-mir-425-5p	SNHG8
hsa-mir-425-5p	LINC02219
hsa-mir-425-5p	LINC01184
hsa-mir-425-5p	HCG18
hsa-mir-425-5p	HCG22
hsa-mir-425-5p	TRAF3IP2-AS1
hsa-mir-4428	SNHG3
hsa-mir-4428	NFYC-AS1
hsa-mir-4428	LINC01748
hsa-mir-4428	ASH1L-IT1
hsa-mir-4428	BLACAT1
hsa-mir-4428	MIR29B2CHG
hsa-mir-4428	DNAJC27-AS1
hsa-mir-4428	CYTOR
hsa-mir-4428	NIFK-AS1
hsa-mir-4428	LINC01806
hsa-mir-4429	SNHG12
hsa-mir-4429	GAS5
hsa-mir-4429	ALMS1-IT1
hsa-mir-4429	BOLA3-AS1
hsa-mir-4429	PAX8-AS1
hsa-mir-4429	PAX8-AS1
hsa-mir-4429	TTN-AS1
hsa-mir-4429	THUMPD3-AS1
hsa-mir-4429	FGD5-AS1
hsa-mir-4429	EIF1B-AS1
hsa-mir-4436a	LINC01128
hsa-mir-4436a	SNHG3
hsa-mir-4436a	RUSC1-AS1
hsa-mir-4436a	MIR181A1HG
hsa-mir-4436a	LINC01304
hsa-mir-4436a	PAX8-AS1
hsa-mir-4436a	LINC01963
hsa-mir-4436a	LINC01963
hsa-mir-4436a	LINC01963
hsa-mir-4436a	EAF1-AS1
hsa-mir-4465	GAS5
hsa-mir-4465	MIR181A1HG
hsa-mir-4465	LINC01703
hsa-mir-4465	THUMPD3-AS1
hsa-mir-4465	SH3BP5-AS1
hsa-mir-4465	DENND6A-DT
hsa-mir-4465	PSMD6-AS2
hsa-mir-4465	NNT-AS1
hsa-mir-4465	LINC00847
hsa-mir-4465	HCG11
hsa-mir-449a	LINC01715
hsa-mir-449a	SLFNL1-AS1
hsa-mir-449a	MIR29B2CHG
hsa-mir-449a	LINC01641
hsa-mir-449a	LINC01132
hsa-mir-449a	PCBP1-AS1
hsa-mir-449a	LINC01816
hsa-mir-449a	LINC01123
hsa-mir-449a	LINC01106
hsa-mir-449a	LINC02035
hsa-mir-449b-5p	LINC01715
hsa-mir-449b-5p	SLFNL1-AS1
hsa-mir-449b-5p	MIR29B2CHG
hsa-mir-449b-5p	LINC01641
hsa-mir-449b-5p	LINC01132
hsa-mir-449b-5p	PCBP1-AS1
hsa-mir-449b-5p	LINC01816
hsa-mir-449b-5p	LINC01123
hsa-mir-449b-5p	LINC01106
hsa-mir-449b-5p	LINC02035
hsa-mir-449c-5p	SNHG3
hsa-mir-449c-5p	SLFNL1-AS1
hsa-mir-449c-5p	GAS5
hsa-mir-449c-5p	LINC01963
hsa-mir-449c-5p	EIF1B-AS1
hsa-mir-449c-5p	FOXP1-IT1
hsa-mir-449c-5p	MYLK-AS1
hsa-mir-449c-5p	WDFY3-AS2
hsa-mir-449c-5p	SNHG8
hsa-mir-449c-5p	HCG9
hsa-mir-450b-5p	MIR34AHG
hsa-mir-450b-5p	MIR29B2CHG
hsa-mir-450b-5p	LINC01250
hsa-mir-450b-5p	NIFK-AS1
hsa-mir-450b-5p	TTN-AS1
hsa-mir-450b-5p	TTN-AS1
hsa-mir-450b-5p	FGD5-AS1
hsa-mir-450b-5p	ENTPD3-AS1
hsa-mir-450b-5p	PSMD6-AS2
hsa-mir-450b-5p	MUC20-OT1
hsa-mir-4662a-5p	LINC01128
hsa-mir-4662a-5p	ZNF436-AS1
hsa-mir-4662a-5p	SNHG3
hsa-mir-4662a-5p	CRYZL2P-SEC16B
hsa-mir-4662a-5p	SOS1-IT1
hsa-mir-4662a-5p	LINC00488
hsa-mir-4662a-5p	HCG18
hsa-mir-4662a-5p	HCG18
hsa-mir-4662a-5p	SNHG6
hsa-mir-4662a-5p	UBR5-AS1
hsa-mir-4735-3p	LINC00622
hsa-mir-4735-3p	GAS5
hsa-mir-4735-3p	LINC00467
hsa-mir-4735-3p	SEPSECS-AS1
hsa-mir-4735-3p	LINC00847
hsa-mir-4735-3p	LINC00847
hsa-mir-4735-3p	LINC00847
hsa-mir-4735-3p	SNHG15
hsa-mir-4735-3p	MSC-AS1
hsa-mir-4735-3p	ZFPM2-AS1
hsa-mir-4761-3p	SLFNL1-AS1
hsa-mir-4761-3p	LINC01359
hsa-mir-4761-3p	CYP1B1-AS1
hsa-mir-4761-3p	LINC02245
hsa-mir-4761-3p	LINC01124
hsa-mir-4761-3p	H1FX-AS1
hsa-mir-4761-3p	MUC20-OT1
hsa-mir-4761-3p	TNK2-AS1
hsa-mir-4761-3p	NOP14-AS1
hsa-mir-4761-3p	NOP14-AS1
hsa-mir-4761-5p	LINC01748
hsa-mir-4761-5p	ADAMTSL4-AS1
hsa-mir-4761-5p	RUSC1-AS1
hsa-mir-4761-5p	ITPKB-IT1
hsa-mir-4761-5p	PSMD6-AS2
hsa-mir-4761-5p	LINC01018
hsa-mir-4761-5p	LIFR-AS1
hsa-mir-4761-5p	CKMT2-AS1
hsa-mir-4761-5p	LINC00847
hsa-mir-4761-5p	LINC00847
hsa-mir-4766-5p	SNHG12
hsa-mir-4766-5p	GAS5
hsa-mir-4766-5p	RN7SL832P
hsa-mir-4766-5p	LINC01123
hsa-mir-4766-5p	LINC01106
hsa-mir-4766-5p	LINC01806
hsa-mir-4766-5p	LINC01963
hsa-mir-4766-5p	LMCD1-AS1
hsa-mir-4766-5p	PTPRG-AS1
hsa-mir-4766-5p	PTPRG-AS1
hsa-mir-506-3p	CCDC18-AS1
hsa-mir-506-3p	LAMTOR5-AS1
hsa-mir-506-3p	LINC01703
hsa-mir-506-3p	SOS1-IT1
hsa-mir-506-3p	PCBP1-AS1
hsa-mir-506-3p	PCGEM1
hsa-mir-506-3p	FGD5-AS1
hsa-mir-506-3p	FGD5-AS1
hsa-mir-506-3p	ENTPD3-AS1
hsa-mir-506-3p	PTPRG-AS1
hsa-mir-506-5p	FOXD2-AS1
hsa-mir-506-5p	DNM3OS
hsa-mir-506-5p	LINC01250
hsa-mir-506-5p	PCBP1-AS1
hsa-mir-506-5p	ALMS1-IT1
hsa-mir-506-5p	AGAP1-IT1
hsa-mir-506-5p	SH3BP5-AS1
hsa-mir-506-5p	DANCR
hsa-mir-506-5p	SNHG8
hsa-mir-506-5p	ZBED3-AS1
hsa-mir-513a-5p	PIK3CD-AS2
hsa-mir-513a-5p	SLFNL1-AS1
hsa-mir-513a-5p	GAS5
hsa-mir-513a-5p	PCAT6
hsa-mir-513a-5p	MIR29B2CHG
hsa-mir-513a-5p	CYTOR
hsa-mir-513a-5p	CYTOR
hsa-mir-513a-5p	CYTOR
hsa-mir-513a-5p	MIR4435-2HG
hsa-mir-513a-5p	HAGLR
hsa-mir-515-5p	SNHG3
hsa-mir-515-5p	SNHG3
hsa-mir-515-5p	SNHG3
hsa-mir-515-5p	SNHG12
hsa-mir-515-5p	GAS5
hsa-mir-515-5p	PAX8-AS1
hsa-mir-515-5p	THUMPD3-AS1
hsa-mir-515-5p	UBE2E2-AS1
hsa-mir-515-5p	LINC01811
hsa-mir-515-5p	EIF1B-AS1
hsa-mir-5195-3p	LINC01355
hsa-mir-5195-3p	SLFNL1-AS1
hsa-mir-5195-3p	PAX8-AS1
hsa-mir-5195-3p	LINC00852
hsa-mir-5195-3p	LINC00852
hsa-mir-5195-3p	XXYLT1-AS2
hsa-mir-5195-3p	MUC20-OT1
hsa-mir-5195-3p	MUC20-OT1
hsa-mir-5195-3p	C5orf66
hsa-mir-5195-3p	HCG18
hsa-mir-519e-5p	SNHG3
hsa-mir-519e-5p	SNHG3
hsa-mir-519e-5p	SNHG3
hsa-mir-519e-5p	SNHG12
hsa-mir-519e-5p	GAS5
hsa-mir-519e-5p	PAX8-AS1
hsa-mir-519e-5p	THUMPD3-AS1
hsa-mir-519e-5p	UBE2E2-AS1
hsa-mir-519e-5p	LINC01811
hsa-mir-519e-5p	EIF1B-AS1
hsa-mir-520a-3p	NPPA-AS1
hsa-mir-520a-3p	PINK1-AS
hsa-mir-520a-3p	SLFNL1-AS1
hsa-mir-520a-3p	CCDC18-AS1
hsa-mir-520a-3p	IL6R-AS1
hsa-mir-520a-3p	MIR181A1HG
hsa-mir-520a-3p	BLACAT1
hsa-mir-520a-3p	LINC01798
hsa-mir-520a-3p	HAGLR
hsa-mir-520a-3p	KLF7-IT1
hsa-mir-520d-3p	NPPA-AS1
hsa-mir-520d-3p	PINK1-AS
hsa-mir-520d-3p	SLFNL1-AS1
hsa-mir-520d-3p	CCDC18-AS1
hsa-mir-520d-3p	IL6R-AS1
hsa-mir-520d-3p	MIR181A1HG
hsa-mir-520d-3p	BLACAT1
hsa-mir-520d-3p	LINC01798
hsa-mir-520d-3p	HAGLR
hsa-mir-520d-3p	KLF7-IT1
hsa-mir-541-3p	SNHG3
hsa-mir-541-3p	ADAMTSL4-AS1
hsa-mir-541-3p	LINC01115
hsa-mir-541-3p	PCBP1-AS1
hsa-mir-541-3p	PAX8-AS1
hsa-mir-541-3p	LINC01124
hsa-mir-541-3p	SLC9A3-AS1
hsa-mir-541-3p	LINC01018
hsa-mir-541-3p	ZBED3-AS1
hsa-mir-541-3p	MIR3936HG
hsa-mir-5581-3p	LAMTOR5-AS1
hsa-mir-5581-3p	LAMTOR5-AS1
hsa-mir-5581-3p	LAMTOR5-AS1
hsa-mir-5581-3p	MIR205HG
hsa-mir-5581-3p	KLF7-IT1
hsa-mir-5581-3p	LINC02035
hsa-mir-5581-3p	TRAF3IP2-AS1
hsa-mir-5581-3p	FAM87A
hsa-mir-5581-3p	EXTL3-AS1
hsa-mir-5581-3p	UBR5-AS1
hsa-mir-561-5p	LINC01128
hsa-mir-561-5p	SNHG3
hsa-mir-561-5p	SNHG12
hsa-mir-561-5p	LINC00466
hsa-mir-561-5p	PAX8-AS1
hsa-mir-561-5p	LINC01825
hsa-mir-561-5p	THAP9-AS1
hsa-mir-561-5p	LIFR-AS1
hsa-mir-561-5p	TMEM161B-AS1
hsa-mir-561-5p	TRIM52-AS1
hsa-mir-577	SNHG3
hsa-mir-577	NIFK-AS1
hsa-mir-577	LINC01876
hsa-mir-577	LINC01238
hsa-mir-577	THUMPD3-AS1
hsa-mir-577	THUMPD3-AS1
hsa-mir-577	FGD5-AS1
hsa-mir-577	DUBR
hsa-mir-577	LPP-AS2
hsa-mir-577	LINC01094
hsa-mir-582-3p	SLC16A1-AS1
hsa-mir-582-3p	AP4B1-AS1
hsa-mir-582-3p	NNT-AS1
hsa-mir-582-3p	LINC02163
hsa-mir-582-3p	LINC00847
hsa-mir-582-3p	LINC01011
hsa-mir-582-3p	HOXA10-AS
hsa-mir-582-3p	LINC01004
hsa-mir-582-3p	PRKCQ-AS1
hsa-mir-582-3p	ZMIZ1-AS1
hsa-mir-590-5p	LINC00852
hsa-mir-590-5p	LINC01184
hsa-mir-590-5p	FAM66E
hsa-mir-590-5p	MSC-AS1
hsa-mir-590-5p	OTUD6B-AS1
hsa-mir-590-5p	PVT1
hsa-mir-590-5p	FAM201A
hsa-mir-590-5p	ZEB1-AS1
hsa-mir-590-5p	SGMS1-AS1
hsa-mir-590-5p	NUTM2A-AS1
hsa-mir-625-3p	LAMTOR5-AS1
hsa-mir-625-3p	LINC02027
hsa-mir-625-3p	LINC02015
hsa-mir-625-3p	MUC20-OT1
hsa-mir-625-3p	SND1-IT1
hsa-mir-625-3p	FAM201A
hsa-mir-625-3p	KCNQ1OT1
hsa-mir-625-3p	KCNQ1OT1
hsa-mir-625-3p	LINC00294
hsa-mir-625-3p	NEAT1
hsa-mir-656-3p	LINC01355
hsa-mir-656-3p	ZRANB2-AS2
hsa-mir-656-3p	TDRKH-AS1
hsa-mir-656-3p	ASH1L-IT1
hsa-mir-656-3p	ASH1L-IT1
hsa-mir-656-3p	DNM3OS
hsa-mir-656-3p	LINC01376
hsa-mir-656-3p	LINC01126
hsa-mir-656-3p	LINC01815
hsa-mir-656-3p	PAX8-AS1
hsa-mir-761	LINC01128
hsa-mir-761	TNFRSF14-AS1
hsa-mir-761	SNHG3
hsa-mir-761	SNHG3
hsa-mir-761	LINC01725
hsa-mir-761	ADAMTSL4-AS1
hsa-mir-761	ADAMTSL4-AS1
hsa-mir-761	RUSC1-AS1
hsa-mir-761	MIR29B2CHG
hsa-mir-761	LINC01703
hsa-mir-877-5p	PINK1-AS
hsa-mir-877-5p	AP4B1-AS1
hsa-mir-877-5p	LINC01291
hsa-mir-877-5p	CYTOR
hsa-mir-877-5p	LINC01806
hsa-mir-877-5p	THUMPD3-AS1
hsa-mir-877-5p	MUC20-OT1
hsa-mir-877-5p	MUC20-OT1
hsa-mir-877-5p	LINC00885
hsa-mir-877-5p	LINC02466
hsa-mir-9-5p	NPPA-AS1
hsa-mir-9-5p	AP4B1-AS1
hsa-mir-9-5p	LINC01871
hsa-mir-9-5p	PCBP1-AS1
hsa-mir-9-5p	LINC01116
hsa-mir-9-5p	TTN-AS1
hsa-mir-9-5p	LINC01238
hsa-mir-9-5p	THUMPD3-AS1
hsa-mir-9-5p	SH3BP5-AS1
hsa-mir-9-5p	CCDC13-AS1
hsa-mir-92a-3p	LINC01128
hsa-mir-92a-3p	MDS2
hsa-mir-92a-3p	LINC00467
hsa-mir-92a-3p	PAX8-AS1
hsa-mir-92a-3p	WWTR1-IT1
hsa-mir-92a-3p	PURPL
hsa-mir-92a-3p	PURPL
hsa-mir-92a-3p	NR2F1-AS1
hsa-mir-92a-3p	MIR3936HG
hsa-mir-92a-3p	SNHG4
hsa-mir-92b-3p	LINC01128
hsa-mir-92b-3p	MDS2
hsa-mir-92b-3p	LINC00467
hsa-mir-92b-3p	PAX8-AS1
hsa-mir-92b-3p	WWTR1-IT1
hsa-mir-92b-3p	PURPL
hsa-mir-92b-3p	PURPL
hsa-mir-92b-3p	NR2F1-AS1
hsa-mir-92b-3p	MIR3936HG
hsa-mir-92b-3p	SNHG4
hsa-mir-942-5p	LINC01359
hsa-mir-942-5p	AP4B1-AS1
hsa-mir-942-5p	LINC01649
hsa-mir-942-5p	ADAMTSL4-AS1
hsa-mir-942-5p	MIR29B2CHG
hsa-mir-942-5p	RNASEH1-AS1
hsa-mir-942-5p	NIFK-AS1
hsa-mir-942-5p	NIFK-AS1
hsa-mir-942-5p	LINC01087
hsa-mir-942-5p	PKP4-AS1

## Sheet: mRNA_miRNA
mRNA	miRNA
ACSL1	hsa-mir-449b-5p
ACSL1	hsa-mir-449a
ACSL1	hsa-mir-34a-5p
ACSL1	hsa-mir-3190-3p
ACSL1	hsa-mir-449c-5p
ACSL1	hsa-mir-34c-5p
ACSL1	hsa-mir-2682-5p
ACSL1	hsa-mir-34b-5p
ACSL1	hsa-mir-205-5p
ACSL1	hsa-mir-4772-3p
ACSL1	hsa-mir-202-5p
ACSL1	hsa-mir-4529-5p
ACSL1	hsa-mir-3714
ACSL1	hsa-mir-4493
ACSL1	hsa-mir-4753-5p
ACSL1	hsa-mir-3619-5p
ACSL1	hsa-mir-506-3p
ACSL1	hsa-mir-4999-5p
ACSL1	hsa-mir-4653-5p
ACSL1	hsa-mir-29b-2-5p
ACSL1	hsa-mir-4309
ACSL1	hsa-mir-4761-5p
ACSL1	hsa-mir-15a-3p
ACSL1	hsa-mir-943
ACSL1	hsa-mir-1253
ACSL1	hsa-mir-4752
ACSL1	hsa-mir-4527
ACSL1	hsa-mir-3921
ACSL1	hsa-mir-134-5p
ACSL1	hsa-mir-3118
ACSL1	hsa-mir-5697
ACSL1	hsa-mir-3198
ACSL1	hsa-mir-761
ACSL1	hsa-mir-5572
ACSL1	hsa-mir-5197-3p
ACSL1	hsa-mir-214-3p
ACSL1	hsa-mir-4726-3p
ACSL1	hsa-mir-3978
ACSL1	hsa-mir-1238-3p
ACSL1	hsa-mir-548b-3p
ACSL1	hsa-mir-4504
ACSL1	hsa-mir-130b-5p
ACSL1	hsa-mir-2117
TSPO	hsa-mir-4716-5p
TSPO	hsa-mir-3163
TSPO	hsa-mir-548am-3p
TSPO	hsa-mir-548ah-3p
TSPO	hsa-mir-5581-3p
TSPO	hsa-mir-21-5p
TSPO	hsa-mir-548aq-3p
TSPO	hsa-mir-1291
TSPO	hsa-mir-506-5p
TSPO	hsa-mir-548ae-3p
TSPO	hsa-mir-5582-3p
TSPO	hsa-mir-590-5p
TSPO	hsa-mir-3194-3p
TSPO	hsa-mir-4283
PDSS1	hsa-mir-30c-5p
PDSS1	hsa-mir-30a-5p
PDSS1	hsa-mir-30e-5p
PDSS1	hsa-mir-30b-5p
PDSS1	hsa-mir-30d-5p
PDSS1	hsa-mir-22-3p
PDSS1	hsa-mir-4766-5p
PDSS1	hsa-mir-4649-5p
PDSS1	hsa-mir-5582-5p
PDSS1	hsa-mir-302c-5p
PDSS1	hsa-mir-4759
PDSS1	hsa-mir-4700-5p
PDSS1	hsa-mir-1226-5p
PDSS1	hsa-mir-3662
PDSS1	hsa-mir-5589-3p
PDSS1	hsa-mir-4486
PDSS1	hsa-mir-3616-3p
PDSS1	hsa-mir-3117-3p
PDSS1	hsa-mir-4729
PDSS1	hsa-mir-4721
PDSS1	hsa-mir-4423-3p
PDSS1	hsa-mir-4641
PDSS1	hsa-mir-450b-5p
PDSS1	hsa-mir-3675-3p
PDSS1	hsa-mir-212-3p
PDSS1	hsa-mir-132-3p
PDSS1	hsa-mir-3977
PDSS1	hsa-mir-449a
PDSS1	hsa-mir-3143
PDSS1	hsa-mir-34a-5p
PDSS1	hsa-mir-876-3p
PDSS1	hsa-mir-4695-3p
PDSS1	hsa-mir-622
PDSS1	hsa-mir-4793-3p
PDSS1	hsa-mir-4666a-5p
PDSS1	hsa-mir-4761-3p
PDSS1	hsa-mir-5010-3p
PDSS1	hsa-mir-320b
PDSS1	hsa-mir-1911-5p
PDSS1	hsa-mir-130b-5p
PDSS1	hsa-mir-4491
PDSS1	hsa-mir-3169
PDSS1	hsa-mir-4429
PDSS1	hsa-mir-3934-5p
PDSS1	hsa-mir-4657
PDSS1	hsa-mir-4774-5p
PDSS1	hsa-mir-320c
PDSS1	hsa-mir-4752
PDSS1	hsa-mir-4667-5p
PDSS1	hsa-mir-320d
PDSS1	hsa-mir-4314
MTHFD2	hsa-mir-767-3p
MTHFD2	hsa-mir-9-5p
MTHFD2	hsa-mir-515-5p
MTHFD2	hsa-mir-519e-5p
MTHFD2	hsa-mir-24-2-5p
MTHFD2	hsa-mir-24-1-5p
MTHFD2	hsa-mir-1273g-3p
MTHFD2	hsa-mir-92a-3p
MTHFD2	hsa-mir-764
MTHFD2	hsa-mir-92b-3p
MTHFD2	hsa-mir-34b-3p
MTHFD2	hsa-mir-1299
MTHFD2	hsa-mir-3150a-3p
MTHFD2	hsa-mir-425-5p
MTHFD2	hsa-mir-4725-5p
MTHFD2	hsa-mir-577
MTHFD2	hsa-mir-548l
MTHFD2	hsa-mir-32-5p
MTHFD2	hsa-mir-323a-3p
MTHFD2	hsa-mir-34c-3p
MTHFD2	hsa-mir-4720-3p
MTHFD2	hsa-mir-4257
MTHFD2	hsa-mir-2116-3p
MTHFD2	hsa-mir-320e
MTHFD2	hsa-mir-4714-3p
MTHFD2	hsa-mir-3665
MTHFD2	hsa-mir-509-5p
MTHFD2	hsa-mir-509-3-5p
MTHFD2	hsa-mir-22-3p
MTHFD2	hsa-mir-4503
MTHFD2	hsa-mir-3152-5p
MTHFD2	hsa-mir-936
MTHFD2	hsa-mir-2467-3p
MTHFD2	hsa-mir-582-3p
MTHFD2	hsa-mir-1911-5p
MTHFD2	hsa-mir-497-3p
MTHFD2	hsa-mir-371a-5p
MTHFD2	hsa-mir-4670-3p
MTHFD2	hsa-mir-5694
MTHFD2	hsa-mir-939-5p
MTHFD2	hsa-mir-875-3p
MTHFD2	hsa-mir-4480
MTHFD2	hsa-mir-2054
MTHFD2	hsa-mir-548as-3p
MTHFD2	hsa-mir-150-5p
MTHFD2	hsa-mir-4713-5p
MTHFD2	hsa-mir-3175
MTHFD2	hsa-mir-3910
MTHFD2	hsa-mir-5093
MTHFD2	hsa-mir-21-3p
MTHFD2	hsa-mir-508-5p
MTHFD2	hsa-mir-1278
MTHFD2	hsa-mir-3180-5p
MTHFD2	hsa-mir-5096
MTHFD2	hsa-mir-4277
MTHFD2	hsa-mir-4680-5p
MTHFD2	hsa-mir-1263
MTHFD2	hsa-mir-3117-5p
MTHFD2	hsa-mir-3116
MTHFD2	hsa-mir-3660
MTHFD2	hsa-mir-4484
MTHFD2	hsa-mir-3622b-5p
MTHFD2	hsa-mir-3668
MTHFD2	hsa-mir-656-3p
MTHFD2	hsa-mir-363-3p
MTHFD2	hsa-mir-499a-3p
MTHFD2	hsa-mir-4690-5p
MTHFD2	hsa-mir-4666a-3p
MTHFD2	hsa-mir-4487
MTHFD2	hsa-mir-1324
MTHFD2	hsa-mir-100-3p
MTHFD2	hsa-mir-4695-5p
MTHFD2	hsa-mir-367-3p
MTHFD2	hsa-mir-942-5p
MTHFD2	hsa-mir-563
MTHFD2	hsa-mir-1285-3p
MTHFD2	hsa-mir-4710
MTHFD2	hsa-mir-1254
MTHFD2	hsa-mir-4684-5p
MTHFD2	hsa-mir-99b-3p
MTHFD2	hsa-mir-4662a-5p
ALDH5A1	hsa-mir-26b-5p
ALDH5A1	hsa-mir-26a-5p
ALDH5A1	hsa-mir-1297
ALDH5A1	hsa-mir-3125
ALDH5A1	hsa-mir-4778-5p
ALDH5A1	hsa-mir-561-5p
ALDH5A1	hsa-mir-1178-3p
ALDH5A1	hsa-mir-3122
ALDH5A1	hsa-mir-432-3p
ALDH5A1	hsa-mir-330-5p
ALDH5A1	hsa-mir-4470
ALDH5A1	hsa-mir-3916
ALDH5A1	hsa-mir-4763-3p
ALDH5A1	hsa-mir-550a-5p
ALDH5A1	hsa-mir-133b
ALDH5A1	hsa-mir-3922-5p
ALDH5A1	hsa-mir-4455
ALDH5A1	hsa-mir-5093
ALDH5A1	hsa-mir-550a-3-5p
ALDH5A1	hsa-mir-5697
ALDH5A1	hsa-mir-4441
ALDH5A1	hsa-mir-513a-5p
ALDH5A1	hsa-mir-3913-5p
ALDH5A1	hsa-mir-1302
ALDH5A1	hsa-mir-4465
ALDH5A1	hsa-mir-3689d
ALDH5A1	hsa-mir-4428
ALDH5A1	hsa-mir-520d-3p
ALDH5A1	hsa-mir-601
ALDH5A1	hsa-mir-548an
ALDH5A1	hsa-mir-3935
ALDH5A1	hsa-mir-188-3p
ALDH5A1	hsa-mir-5683
ALDH5A1	hsa-mir-877-5p
ALDH5A1	hsa-mir-3611
ALDH5A1	hsa-mir-3117-5p
ALDH5A1	hsa-mir-4298
ALDH5A1	hsa-mir-1261
ALDH5A1	hsa-mir-4735-3p
ALDH5A1	hsa-mir-1207-5p
ALDH5A1	hsa-mir-3907
ALDH5A1	hsa-mir-31-3p
ALDH5A1	hsa-mir-4436b-3p
ALDH5A1	hsa-mir-3688-5p
ALDH5A1	hsa-mir-4661-3p
ALDH5A1	hsa-mir-5008-3p
ALDH5A1	hsa-mir-4515
ALDH5A1	hsa-mir-520a-3p
ALDH5A1	hsa-mir-3184-3p
ALDH5A1	hsa-mir-1271-3p
ALDH5A1	hsa-mir-4284
ALDH5A1	hsa-mir-376b-3p
ALDH5A1	hsa-mir-484
ALDH5A1	hsa-mir-22-5p
ALDH5A1	hsa-mir-210-3p
ALDH5A1	hsa-mir-1255a
ALDH5A1	hsa-mir-4270
ALDH5A1	hsa-mir-3668
ALDH5A1	hsa-mir-4436a
ALDH5A1	hsa-mir-376a-3p
ALDH5A1	hsa-mir-4294
ALDH5A1	hsa-mir-4487
ALDH5A1	hsa-mir-326
ALDH5A1	hsa-mir-3910
ALDH5A1	hsa-mir-3155b
ALDH5A1	hsa-mir-5195-3p
ALDH5A1	hsa-mir-541-3p
ALDH5A1	hsa-mir-573
ALDH5A1	hsa-mir-3155a
ALDH5A1	hsa-mir-148b-5p
ALDH5A1	hsa-mir-630
ALDH5A1	hsa-mir-1255b-5p
ALDH5A1	hsa-mir-708-3p
ALDH5A1	hsa-mir-5001-3p
ALDH5A1	hsa-mir-3974
ALDH5A1	hsa-mir-3934-5p
ALDH5A1	hsa-mir-1825
ALDH5A1	hsa-mir-4700-3p
ALDH5A1	hsa-mir-3128
ALDH5A1	hsa-mir-3192-5p
ALDH5A1	hsa-mir-2113
ALDH5A1	hsa-mir-570-3p
ALDH5A1	hsa-mir-4498
ALDH5A1	hsa-mir-125b-2-3p
ALDH5A1	hsa-mir-18b-5p
ALDH5A1	hsa-mir-18a-5p
ALDH5A1	hsa-mir-605-5p
ALDH5A1	hsa-mir-93-3p
ALAS1	hsa-mir-625-3p
ALAS1	hsa-mir-4791
ALAS1	hsa-mir-4282
ALAS1	hsa-mir-130a-5p
ALAS1	hsa-mir-410-3p
ALAS1	hsa-mir-4503
ALAS1	hsa-mir-4759
ALAS1	hsa-mir-3170
ALAS1	hsa-mir-3201
ALAS1	hsa-mir-451b
ALAS1	hsa-mir-661
