# Supplementary material for: Bioinformatics-based identification and validation of mitochondria-related genes associated with neonatal sepsis
Source: PeerJ. 2025 Dec 17;13:e20441. doi: 10.7717/peerj.20441 (PMC12717851; doi:10.7717/peerj.20441)
Supplement: Supplemental Information 5 [file peerj-13-20441-s005.xlsx]

## Sheet: Supplementary Table 4
drug	mRNA
Flumazenil	TSPO
PK 11195	TSPO
Valproic Acid	TSPO
bisphenol A	TSPO
Particulate Matter	TSPO
Tetrachlorodibenzodioxin	TSPO
Sarin	TSPO
Benzo(a)pyrene	TSPO
Dibutyl Phthalate	TSPO
4-(5-benzo(1,3)dioxol-5-yl-4-pyridin-2-yl-1H-imidazol-2-yl)benzamide	TSPO
Allethrins	TSPO
cyhalothrin	TSPO
cypermethrin	TSPO
decamethrin	TSPO
Diethylhexyl Phthalate	TSPO
dorsomorphin	TSPO
Ethanol	TSPO
fenvalerate	TSPO
Gasoline	TSPO
Nanotubes, Carbon	TSPO
pirinixic acid	TSPO
Polycyclic Aromatic Hydrocarbons	TSPO
Thioacetamide	TSPO
Ammonium Chloride	TSPO
bifenthrin	TSPO
Cisplatin	TSPO
Doxorubicin	TSPO
entinostat	TSPO
Estradiol	TSPO
methylmercuric chloride	TSPO
Midazolam	TSPO
perfluorooctane sulfonic acid	TSPO
Permethrin	TSPO
Phenobarbital	TSPO
pyrachlostrobin	TSPO
Quinolines	TSPO
SSR180575	TSPO
Tobacco Smoke Pollution	TSPO
trichostatin A	TSPO
triphenyl phosphate	TSPO
1,2-Dimethylhydrazine	TSPO
1-hydroxymethylmidazolam	TSPO
1-Naphthylisothiocyanate	TSPO
4'-chlorodiazepam	TSPO
9,10-Dimethyl-1,2-benzanthracene	TSPO
Amides	TSPO
Atropine	TSPO
bis(4-hydroxyphenyl)sulfone	TSPO
Cadmium Chloride	TSPO
Carbon Tetrachloride	TSPO
chloropicrin	TSPO
cobaltous chloride	TSPO
Cuprizone	TSPO
DAA 1097	TSPO
Diethylnitrosamine	TSPO
furan	TSPO
hexabromocyclododecane	TSPO
Hydrogen Peroxide	TSPO
jinfukang	TSPO
Manganese	TSPO
mono-(2-ethylhexyl)phthalate	TSPO
N-benzyl-N-ethyl-2-(7,8-dihydro-7-methyl-8-oxo-2-phenyl-9H-purin-9-yl)acetamide	TSPO
Panobinostat	TSPO
picoxystrobin	TSPO
Propylthiouracil	TSPO
Pyrethrins	TSPO
Resveratrol	TSPO
Smoke	TSPO
testosterone enanthate	TSPO
tributyltin	TSPO
trimethylene-bis(4-hydroxyiminomethylpyridinium)	TSPO
Vehicle Emissions	TSPO
1-(5-fluoropentyl)-3-(1-naphthoyl)indole	TSPO
1-Butanol	TSPO
1-Methyl-4-phenylpyridinium	TSPO
1-pentyl-3-(1-naphthoyl)indole	TSPO
2,2',4,4'-tetrabromodiphenyl ether	TSPO
2,4-dinitrotoluene	TSPO
2,6-dinitrotoluene	TSPO
3,4,5,3',4'-pentachlorobiphenyl	TSPO
4,4'-diaminodiphenylmethane	TSPO
acetamide	TSPO
Acetaminophen	TSPO
Acrylamide	TSPO
actein	TSPO
Air Pollutants	TSPO
alpidem	TSPO
Amitrole	TSPO
Ammonia	TSPO
Amphetamine	TSPO
aristolochic acid I	TSPO
arsenite	TSPO
Ascorbic Acid	TSPO
Atrazine	TSPO
Benzodiazepines	TSPO
Biological Factors	TSPO
bisphenol F	TSPO
butylparaben	TSPO
Cadmium	TSPO
carbonyl sulfide	TSPO
Cellulose	TSPO
Chlorodiphenyl (54% Chlorine)	TSPO
chromium hexavalent ion	TSPO
Clofibrate	TSPO
Copper	TSPO
Corticosterone	TSPO
Cyclosporine	TSPO
Cytarabine	TSPO
Decitabine	TSPO
Deferoxamine	TSPO
deoxynivalenol	TSPO
Dexrazoxane	TSPO
Diazepam	TSPO
Dietary Fats	TSPO
Diethylstilbestrol	TSPO
diisobutyl phthalate	TSPO
Dimethylnitrosamine	TSPO
Dronabinol	TSPO
Ethinyl Estradiol	TSPO
ethylene dichloride	TSPO
ezogabine	TSPO
Fenretinide	TSPO
Flunitrazepam	TSPO
fluorotelomer alcohols	TSPO
Fluorouracil	TSPO
Flutamide	TSPO
FOE 5043	TSPO
Folic Acid	TSPO
fumonisin B1	TSPO
Genistein	TSPO
Gentamicins	TSPO
Glafenine	TSPO
Heptachlor	TSPO
Heptachlor Epoxide	TSPO
Hydralazine	TSPO
ICG 001	TSPO
imidacloprid	TSPO
Ionomycin	TSPO
isobutyl alcohol	TSPO
(+)-JQ1 compound	TSPO
Ketamine	TSPO
Ketolides	TSPO
Lead	TSPO
lipopolysaccharide, E. coli O26-B6	TSPO
Lipopolysaccharides	TSPO
Menthol	TSPO
Methamphetamine	TSPO
Methimazole	TSPO
methylarsine oxide	TSPO
Methyl Methanesulfonate	TSPO
Methylnitrosourea	TSPO
Mifepristone	TSPO
MT19c compound	TSPO
N-benzyl-N-methyl-2-(7-methyl-8-oxo-2-phenyl-7,8-dihydro-9H-purin-9-yl)acetamide	TSPO
Neurotransmitter Agents	TSPO
Nicotine	TSPO
nitrosobenzylmethylamine	TSPO
Norethindrone Acetate	TSPO
olesoxime	TSPO
O,O-diethyl O-3,5,6-trichloro-2-pyridyl phosphate	TSPO
Oxaliplatin	TSPO
oxybenzone	TSPO
Palm Oil	TSPO
Pectins	TSPO
Pentachlorophenol	TSPO
perfluorohexanesulfonic acid	TSPO
perfluorooctanesulfonamide	TSPO
perfluorooctanoic acid	TSPO
Phosgene	TSPO
Porphyrins	TSPO
procymidone	TSPO
Propoxur	TSPO
protoporphyrin IX	TSPO
Ro 19-8022	TSPO
Rotenone	TSPO
Salicylic Acid	TSPO
Selenomethionine	TSPO
sodium arsenite	TSPO
sodium bichromate	TSPO
Soman	TSPO
Streptozocin	TSPO
Sulfadimethoxine	TSPO
tert-Butylhydroperoxide	TSPO
Tetracycline	TSPO
Tetradecanoylphorbol Acetate	TSPO
Thapsigargin	TSPO
tinuvin	TSPO
Tretinoin	TSPO
triadimefon	TSPO
Triclosan	TSPO
Trinitrotoluene	TSPO
tris(chloroethyl)phosphate	TSPO
Tungsten	TSPO
Tunicamycin	TSPO
Vancomycin	TSPO
vinclozolin	TSPO
Vorinostat	TSPO
Warfarin	TSPO
zinc hematoporphyrin	TSPO
Ziram	TSPO
pirinixic acid	ACSL1
Fenofibrate	ACSL1
Ethanol	ACSL1
Tetrachlorodibenzodioxin	ACSL1
bisphenol A	ACSL1
perfluorooctanoic acid	ACSL1
perfluorooctane sulfonic acid	ACSL1
Acetaminophen	ACSL1
Clofibrate	ACSL1
Dexamethasone	ACSL1
Valproic Acid	ACSL1
Benzo(a)pyrene	ACSL1
Bezafibrate	ACSL1
Dietary Fats	ACSL1
Rosiglitazone	ACSL1
1-Methyl-3-isobutylxanthine	ACSL1
Carbon Tetrachloride	ACSL1
Cyclosporine	ACSL1
linalool	ACSL1
Oxygen	ACSL1
Ethinyl Estradiol	ACSL1
Progesterone	ACSL1
Troglitazone	ACSL1
4-(5-benzo(1,3)dioxol-5-yl-4-pyridin-2-yl-1H-imidazol-2-yl)benzamide	ACSL1
Aflatoxin B1	ACSL1
ammonium 2,3,3,3-tetrafluoro-2-(heptafluoropropoxy)-propanoate	ACSL1
Diethylhexyl Phthalate	ACSL1
dorsomorphin	ACSL1
Ozone	ACSL1
Chenodeoxycholic Acid	ACSL1
Deoxycholic Acid	ACSL1
Estradiol	ACSL1
Glycochenodeoxycholic Acid	ACSL1
Glycocholic Acid	ACSL1
Glycodeoxycholic Acid	ACSL1
Indomethacin	ACSL1
Nanotubes, Carbon	ACSL1
Zinc	ACSL1
1-Naphthylisothiocyanate	ACSL1
Cadmium Chloride	ACSL1
Copper	ACSL1
Doxorubicin	ACSL1
furan	ACSL1
Ibuprofen	ACSL1
Lipopolysaccharides	ACSL1
Pregnenolone Carbonitrile	ACSL1
sulforaphane	ACSL1
Tamoxifen	ACSL1
Tetracycline	ACSL1
Thioacetamide	ACSL1
Tolcapone	ACSL1
Trichloroethylene	ACSL1
1-(2-trifluoromethoxyphenyl)-2-nitroethanone	ACSL1
2,6-dinitrotoluene	ACSL1
4,4'-diaminodiphenylmethane	ACSL1
alpha-Chlorohydrin	ACSL1
Arsenic Trioxide	ACSL1
Benzene	ACSL1
bis(4-hydroxyphenyl)sulfone	ACSL1
Butyrates	ACSL1
Cadmium	ACSL1
Chlorine	ACSL1
Cisplatin	ACSL1
Diethylnitrosamine	ACSL1
Dimethylnitrosamine	ACSL1
dioscin	ACSL1
entinostat	ACSL1
Flame Retardants	ACSL1
Flutamide	ACSL1
Fulvestrant	ACSL1
gardiquimod	ACSL1
Gentamicins	ACSL1
hexabromocyclododecane	ACSL1
JP8 aviation fuel	ACSL1
lipopolysaccharide, E coli O55-B5	ACSL1
Lithocholic Acid	ACSL1
Metformin	ACSL1
nefazodone	ACSL1
nickel chloride	ACSL1
Oleic Acid	ACSL1
Palmitic Acid	ACSL1
Panobinostat	ACSL1
Paraquat	ACSL1
Particulate Matter	ACSL1
perfluorohexanesulfonic acid	ACSL1
Phenylmercuric Acetate	ACSL1
Promegestone	ACSL1
S-(1,2-dichlorovinyl)cysteine	ACSL1
sodium arsenite	ACSL1
Sodium Fluoride	ACSL1
squalestatin 1	ACSL1
titanium dioxide	ACSL1
Tobacco Smoke Pollution	ACSL1
Toluene	ACSL1
Topotecan	ACSL1
Tretinoin	ACSL1
Triclosan	ACSL1
vinclozolin	ACSL1
Zoledronic Acid	ACSL1
1,2-Dimethylhydrazine	ACSL1
1-(4-((4-phenyl-5-trifluoromethyl-2-thienyl)methoxy)benzyl)azetidine-3-carboxylic acid	ACSL1
1-Butanol	ACSL1
2-(1H-indazol-4-yl)-6-(4-methanesulfonylpiperazin-1-ylmethyl)-4-morpholin-4-ylthieno(3,2-d)pyrimidine	ACSL1
2,2',4,4'-tetrabromodiphenyl ether	ACSL1
2',3,3',4',5-pentachloro-4-hydroxybiphenyl	ACSL1
2,3-dimethoxy-1,4-naphthoquinone	ACSL1
2,4-dinitrotoluene	ACSL1
3-(2-hydroxy-4-(2-methylnonan-2-yl)phenyl)cyclohexan-1-ol	ACSL1
3,4,3',4'-tetrachlorobiphenyl	ACSL1
4-(2-bromo-6-pyrrolidin-1-ylpyridine-4-sulfonyl)phenylamine	ACSL1
4-(4-(2,4-dioxothiazolidin-5-ylidenemethyl)-2-methoxyphenoxy)-3-trifluoromethylbenzonitrile	ACSL1
4,4'-hexafluorisopropylidene diphenol	ACSL1
4-Nitroquinoline-1-oxide	ACSL1
4-(N-methyl-N-nitrosamino)-1-(3-pyridyl)-1-butanone	ACSL1
5-chloro-1-(4-chlorobenzyl)-3-(phenylthio)indole-2-carboxylic acid	ACSL1
9,10-Dimethyl-1,2-benzanthracene	ACSL1
acetamide	ACSL1
Acrolein	ACSL1
aflatoxin B2	ACSL1
Ammonium Chloride	ACSL1
Antimony	ACSL1
Antimony Potassium Tartrate	ACSL1
aristolochic acid I	ACSL1
aristolochic acid II	ACSL1
arsenite	ACSL1
Atazanavir Sulfate	ACSL1
AZM551248	ACSL1
Beclomethasone	ACSL1
benzo(k)fluoranthene	ACSL1
Bexarotene	ACSL1
bicalutamide	ACSL1
bisphenol B	ACSL1
bisphenol E	ACSL1
bisphenol F	ACSL1
bromobenzene	ACSL1
Carbamazepine	ACSL1
Carcinogens	ACSL1
Cellulose	ACSL1
chloroacetaldehyde	ACSL1
Chlorodiphenyl (54% Chlorine)	ACSL1
Chloroform	ACSL1
Chlorpyrifos	ACSL1
Choline	ACSL1
Chromium	ACSL1
Cidofovir	ACSL1
ciglitazone	ACSL1
ciprofibrate	ACSL1
Clodronic Acid	ACSL1
cobaltous chloride	ACSL1
Copper Sulfate	ACSL1
cyproconazole	ACSL1
Dasatinib	ACSL1
Dehydroepiandrosterone	ACSL1
Dexrazoxane	ACSL1
Dichloroacetic Acid	ACSL1
Diethylstilbestrol	ACSL1
di-n-hexyl phthalate	ACSL1
Dinitrochlorobenzene	ACSL1
di-n-pentyl phthalate	ACSL1
dioxinodehydroeckol	ACSL1
diphenylarsinic acid	ACSL1
Diquat	ACSL1
Diuron	ACSL1
Endosulfan	ACSL1
entacapone	ACSL1
epigallocatechin gallate	ACSL1
epoxiconazole	ACSL1
Erythromycin Estolate	ACSL1
Ethyl Methanesulfonate	ACSL1
fenofibric acid	ACSL1
Fenoprofen	ACSL1
fenoxycarb	ACSL1
fenvalerate	ACSL1
fumonisin B1	ACSL1
Gasoline	ACSL1
Glafenine	ACSL1
glucosamine 6-O-sulfate	ACSL1
GW 7647	ACSL1
Hydrogen Peroxide	ACSL1
Ifosfamide	ACSL1
Inulin	ACSL1
Iron	ACSL1
Isoproterenol	ACSL1
Ivermectin	ACSL1
K 7174	ACSL1
Ketone Bodies	ACSL1
Medroxyprogesterone Acetate	ACSL1
mercuric bromide	ACSL1
Mercury	ACSL1
methacrylaldehyde	ACSL1
Methoprene	ACSL1
methoxyacetic acid	ACSL1
Methylazoxymethanol Acetate	ACSL1
methyleugenol	ACSL1
methylmercuric chloride	ACSL1
Methyl Methanesulfonate	ACSL1
Mitomycin	ACSL1
mono-(2-ethylhexyl)phthalate	ACSL1
muraglitazar	ACSL1
nickel monoxide	ACSL1
Niclosamide	ACSL1
Nicotine	ACSL1
nimesulide	ACSL1
nitrofen	ACSL1
N-Methyl-3,4-methylenedioxyamphetamine	ACSL1
nonylphenol	ACSL1
Norethindrone Acetate	ACSL1
NSC 689534	ACSL1
obeticholic acid	ACSL1
ochratoxin A	ACSL1
osthol	ACSL1
Oxaliplatin	ACSL1
pantogab	ACSL1
perfluorobutanesulfonic acid	ACSL1
perfluorodecanoic acid	ACSL1
perfluorohexanoic acid	ACSL1
perfluoro-n-heptanoic acid	ACSL1
perfluoro-n-nonanoic acid	ACSL1
Permethrin	ACSL1
Phenobarbital	ACSL1
Phlorhizin	ACSL1
Polycyclic Aromatic Hydrocarbons	ACSL1
Potassium Dichromate	ACSL1
Pravastatin	ACSL1
Prednisolone	ACSL1
propiconazole	ACSL1
Propylthiouracil	ACSL1
Protein Kinase Inhibitors	ACSL1
Pyrrolizidine Alkaloids	ACSL1
Raloxifene Hydrochloride	ACSL1
Ro 65-7199	ACSL1
Rotenone	ACSL1
schizandrin B	ACSL1
Scopoletin	ACSL1
Selenium	ACSL1
senkirkine	ACSL1
Silicon Dioxide	ACSL1
Silymarin	ACSL1
sodium bichromate	ACSL1
Sulindac	ACSL1
tanshinone	ACSL1
Temozolomide	ACSL1
tesaglitazar	ACSL1
Tetrachloroethylene	ACSL1
tributyltin	ACSL1
trichostatin A	ACSL1
Triiodothyronine	ACSL1
triphenyltin chloride	ACSL1
triptonide	ACSL1
triticonazole	ACSL1
Tungsten	ACSL1
Turpentine	ACSL1
ursodoxicoltaurine	ACSL1
Vancomycin	ACSL1
vinylidene chloride	ACSL1
Vitamin K 3	ACSL1
Zinc Oxide	ACSL1
Tetrachlorodibenzodioxin	ALAS1
Phenobarbital	ALAS1
Benzo(a)pyrene	ALAS1
bisphenol A	ALAS1
Griseofulvin	ALAS1
Acetaminophen	ALAS1
ferric nitrilotriacetate	ALAS1
Valproic Acid	ALAS1
Tretinoin	ALAS1
Carbon Tetrachloride	ALAS1
Clofibrate	ALAS1
Ethinyl Estradiol	ALAS1
Glutethimide	ALAS1
perfluorooctane sulfonic acid	ALAS1
sodium arsenite	ALAS1
1,2,4-trichlorobenzene	ALAS1
3,4,5,3',4'-pentachlorobiphenyl	ALAS1
Cyclosporine	ALAS1
Dibutyl Phthalate	ALAS1
Heme	ALAS1
Heptachlor	ALAS1
Nanotubes, Carbon	ALAS1
pirinixic acid	ALAS1
Arsenic Trioxide	ALAS1
Estradiol	ALAS1
Hexachlorocyclohexane	ALAS1
MG 262	ALAS1
Paraquat	ALAS1
perfluorooctanoic acid	ALAS1
succinylacetone	ALAS1
tris(1,3-dichloro-2-propyl)phosphate	ALAS1
Water Pollutants, Chemical	ALAS1
1,4-bis(2-(3,5-dichloropyridyloxy))benzene	ALAS1
2,4,5,2',4',5'-hexachlorobiphenyl	ALAS1
6-hydroxy-2,5,7,8-tetramethylchroman-2-carboxylic acid	ALAS1
Aflatoxin B1	ALAS1
Amiodarone	ALAS1
Ascorbic Acid	ALAS1
bis(2-ethylhexyl) 2,3,4,5-tetrabromophthalate	ALAS1
bis(4-hydroxyphenyl)sulfone	ALAS1
Cadmium Chloride	ALAS1
cobaltous chloride	ALAS1
Cycloheximide	ALAS1
Daunorubicin	ALAS1
decabromobiphenyl ether	ALAS1
Dietary Fats	ALAS1
Diethylhexyl Phthalate	ALAS1
Doxorubicin	ALAS1
Ethanol	ALAS1
Flame Retardants	ALAS1
Gossypol	ALAS1
Hemin	ALAS1
hydrazine	ALAS1
Indomethacin	ALAS1
Isoniazid	ALAS1
Mephenytoin	ALAS1
methylmercuric chloride	ALAS1
Methyl Methanesulfonate	ALAS1
Particulate Matter	ALAS1
pentabromodiphenyl ether	ALAS1
Pregnenolone Carbonitrile	ALAS1
propylisopropylacetamide	ALAS1
Protease Inhibitors	ALAS1
Rifampin	ALAS1
Selenium	ALAS1
sodium arsenate	ALAS1
Streptozocin	ALAS1
systhane	ALAS1
tert-Butylhydroperoxide	ALAS1
Tetracycline	ALAS1
Triclosan	ALAS1
1,2-Dimethylhydrazine	ALAS1
1,3-butadiene	ALAS1
1-Methyl-3-isobutylxanthine	ALAS1
1-Methyl-4-phenylpyridinium	ALAS1
2,2',3,3',4,4',6,6'-octabromodiphenyl ether	ALAS1
2,2',4,4'-tetrabromodiphenyl ether	ALAS1
2',3,3',4',5-pentachloro-4-hydroxybiphenyl	ALAS1
2,3,5-trichlorophenyl methyl sulfone	ALAS1
2,3,7,8-tetrachlorodibenzofuran	ALAS1
2,4,6-tris(2,4,6-tribromophenoxy)-1,3,5-triazine	ALAS1
3,4,3',4'-tetrachlorobiphenyl	ALAS1
3-((6-(2-methoxyphenyl)pyrimidin-4-yl)amino)phenyl)methane sulfonamide	ALAS1
4,4'-diaminodiphenylmethane	ALAS1
Air Pollutants	ALAS1
alpha-Tocopherol	ALAS1
Aluminum	ALAS1
Aminolevulinic Acid	ALAS1
Amitrole	ALAS1
Antimycin A	ALAS1
Aspirin	ALAS1
benzo(b)fluoranthene	ALAS1
benzo(b)fluorene	ALAS1
Benzophenanthridines	ALAS1
beta-hexachlorocyclohexane	ALAS1
bisphenol F	ALAS1
Bucladesine	ALAS1
Buthionine Sulfoximine	ALAS1
Butyric Acid	ALAS1
Captan	ALAS1
Cellulose	ALAS1
Cephaloridine	ALAS1
Chlordan	ALAS1
chlorobenzene	ALAS1
Chloroprene	ALAS1
Chlorpromazine	ALAS1
Chlorpyrifos	ALAS1
Cholic Acids	ALAS1
chromium protoporphyrin IX	ALAS1
Copper	ALAS1
Copper Sulfate	ALAS1
Curcumin	ALAS1
Dactinomycin	ALAS1
DDT	ALAS1
decamethrin	ALAS1
Deferoxamine	ALAS1
Dexamethasone	ALAS1
Dexrazoxane	ALAS1
Diclofenac	ALAS1
dicrotophos	ALAS1
Diethylstilbestrol	ALAS1
Dioxins	ALAS1
Diquat	ALAS1
Dronabinol	ALAS1
Drugs, Chinese Herbal	ALAS1
epoxiconazole	ALAS1
Ethyl Methanesulfonate	ALAS1
Etoposide	ALAS1
Felbamate	ALAS1
fenoxycarb	ALAS1
Fish Oils	ALAS1
Flavonoids	ALAS1
Flutamide	ALAS1
Folic Acid	ALAS1
folpet	ALAS1
fomesafen	ALAS1
Genistein	ALAS1
Glafenine	ALAS1
Hydrocarbons, Chlorinated	ALAS1
hyperforin	ALAS1
Inulin	ALAS1
Ionomycin	ALAS1
Isotretinoin	ALAS1
Ketoconazole	ALAS1
Lamotrigine	ALAS1
Leflunomide	ALAS1
Lipopolysaccharides	ALAS1
Malathion	ALAS1
Melatonin	ALAS1
Methapyrilene	ALAS1
Methimazole	ALAS1
Methoprene	ALAS1
Methotrexate	ALAS1
Methylcholanthrene	ALAS1
Methylmercury Compounds	ALAS1
Methylmethacrylate	ALAS1
Methyltestosterone	ALAS1
N-(2-(1,1'-bicyclopropyl)-2-ylphenyl)-3-(difluoromethyl)-1-methyl-1H-pyrazole-4-carboxamide	ALAS1
Naphthoquinones	ALAS1
nefazodone	ALAS1
Nickel	ALAS1
nimesulide	ALAS1
N-methylprotoporphyrin IX	ALAS1
nonylphenol	ALAS1
Oxygen	ALAS1
Pentachlorophenol	ALAS1
perfluorohexanesulfonic acid	ALAS1
perfluoro-n-nonanoic acid	ALAS1
perfluorooctanesulfonamide	ALAS1
Petroleum	ALAS1
Phthalic Acids	ALAS1
Piperonyl Butoxide	ALAS1
Polychlorinated Biphenyls	ALAS1
Porphyrins	ALAS1
Proadifen	ALAS1
Progesterone	ALAS1
propiconazole	ALAS1
Propylthiouracil	ALAS1
pyridine	ALAS1
Quercetin	ALAS1
retene	ALAS1
Rosiglitazone	ALAS1
Rotenone	ALAS1
S-(1,2-dichlorovinyl)cysteine	ALAS1
schizandrin B	ALAS1
Sevoflurane	ALAS1
Smoke	ALAS1
sodium bichromate	ALAS1
Soot	ALAS1
squalestatin 1	ALAS1
T-2 Toxin	ALAS1
tamibarotene	ALAS1
Tamoxifen	ALAS1
tert-butylphenyl diphenyl phosphate	ALAS1
Testosterone	ALAS1
tetradecabromodiphenoxybenzene	ALAS1
Tetradecanoylphorbol Acetate	ALAS1
Thimerosal	ALAS1
Thioacetamide	ALAS1
Tiagabine	ALAS1
titanium dioxide	ALAS1
Tobacco Smoke Pollution	ALAS1
triadimefon	ALAS1
tributyltin	ALAS1
Trichloroethylene	ALAS1
trichostatin A	ALAS1
triphenyl phosphate	ALAS1
triptonide	ALAS1
Urethane	ALAS1
valdecoxib	ALAS1
vanadyl sulfate	ALAS1
Vorinostat	ALAS1
Zinc	ALAS1
bisphenol A	ALDH5A1
Benzo(a)pyrene	ALDH5A1
Valproic Acid	ALDH5A1
Maneb	ALDH5A1
Paraquat	ALDH5A1
Acetaminophen	ALDH5A1
Air Pollutants	ALDH5A1
Carbon Tetrachloride	ALDH5A1
Cyclosporine	ALDH5A1
Tetrachlorodibenzodioxin	ALDH5A1
Thioacetamide	ALDH5A1
4-hydroxybutyric acid	ALDH5A1
9-(6-aminopyridin-3-yl)-1-(3-(trifluoromethyl)phenyl)benzo(h)(1,6)naphthyridin-2(1H)-one	ALDH5A1
Acrylamide	ALDH5A1
Aflatoxin B1	ALDH5A1
aristolochic acid I	ALDH5A1
Atrazine	ALDH5A1
Cisplatin	ALDH5A1
Dibutyl Phthalate	ALDH5A1
Ethinyl Estradiol	ALDH5A1
Leflunomide	ALDH5A1
methylmercuric chloride	ALDH5A1
motexafin gadolinium	ALDH5A1
NCS 382	ALDH5A1
Nickel	ALDH5A1
sodium arsenite	ALDH5A1
succinic semialdehyde	ALDH5A1
Superoxides	ALDH5A1
Tobacco Smoke Pollution	ALDH5A1
Tretinoin	ALDH5A1
Zinc Acetate	ALDH5A1
1,2-Dimethylhydrazine	ALDH5A1
2',3,3',4',5-pentachloro-4-hydroxybiphenyl	ALDH5A1
4-(5-benzo(1,3)dioxol-5-yl-4-pyridin-2-yl-1H-imidazol-2-yl)benzamide	ALDH5A1
abrine	ALDH5A1
Acetaldehyde	ALDH5A1
acetamide	ALDH5A1
Adenosine Triphosphate	ALDH5A1
Amitrole	ALDH5A1
Ammonium Chloride	ALDH5A1
AZM551248	ALDH5A1
beauvericin	ALDH5A1
Benomyl	ALDH5A1
benzo(k)fluoranthene	ALDH5A1
bisphenol F	ALDH5A1
Bortezomib	ALDH5A1
bromfenacoum	ALDH5A1
butyraldehyde	ALDH5A1
Cellulose	ALDH5A1
CGP 52608	ALDH5A1
Chlorpyrifos	ALDH5A1
Clofibrate	ALDH5A1
cobaltous chloride	ALDH5A1
Copper	ALDH5A1
Copper Sulfate	ALDH5A1
Creosote	ALDH5A1
cypermethrin	ALDH5A1
decabromobiphenyl ether	ALDH5A1
decamethrin	ALDH5A1
deoxynivalenol	ALDH5A1
dorsomorphin	ALDH5A1
Doxorubicin	ALDH5A1
Dronabinol	ALDH5A1
Endosulfan	ALDH5A1
enniatins	ALDH5A1
Ethanol	ALDH5A1
fenoxycarb	ALDH5A1
Fenretinide	ALDH5A1
Folic Acid	ALDH5A1
gamma-Aminobutyric Acid	ALDH5A1
Genistein	ALDH5A1
Glafenine	ALDH5A1
heliotrine	ALDH5A1
Indomethacin	ALDH5A1
Iodine	ALDH5A1
Ionomycin	ALDH5A1
jinfukang	ALDH5A1
Lactic Acid	ALDH5A1
Lead	ALDH5A1
mancozeb	ALDH5A1
masitinib	ALDH5A1
Melatonin	ALDH5A1
Mercury	ALDH5A1
Methimazole	ALDH5A1
Methoprene	ALDH5A1
NAD	ALDH5A1
Nanotubes, Carbon	ALDH5A1
n-butoxyacetaldehyde	ALDH5A1
nickel sulfate	ALDH5A1
nonylphenol	ALDH5A1
NSC 689534	ALDH5A1
perfluorooctane sulfonic acid	ALDH5A1
perfluorooctanoic acid	ALDH5A1
pirinixic acid	ALDH5A1
Polychlorinated Biphenyls	ALDH5A1
Progesterone	ALDH5A1
Propylthiouracil	ALDH5A1
Protons	ALDH5A1
Pyrrolizidine Alkaloids	ALDH5A1
Quercetin	ALDH5A1
Reactive Oxygen Species	ALDH5A1
Rotenone	ALDH5A1
S-2-pentyl-4-pentynoic hydroxamic acid	ALDH5A1
schizandrin B	ALDH5A1
senkirkine	ALDH5A1
Silicon Dioxide	ALDH5A1
Silymarin	ALDH5A1
sodium perchlorate	ALDH5A1
Sulfadimethoxine	ALDH5A1
Sunitinib	ALDH5A1
tesaglitazar	ALDH5A1
Tetradecanoylphorbol Acetate	ALDH5A1
tetrahydropalmatine	ALDH5A1
Thapsigargin	ALDH5A1
Thimerosal	ALDH5A1
tris(1,3-dichloro-2-propyl)phosphate	ALDH5A1
Tunicamycin	ALDH5A1
Vanadates	ALDH5A1
Vancomycin	ALDH5A1
Vehicle Emissions	ALDH5A1
Vorinostat	ALDH5A1
XL765	ALDH5A1
Tetrachlorodibenzodioxin	MTHFD2
bisphenol A	MTHFD2
Benzo(a)pyrene	MTHFD2
Cyclosporine	MTHFD2
sodium arsenite	MTHFD2
Acetaminophen	MTHFD2
Ozone	MTHFD2
Valproic Acid	MTHFD2
Particulate Matter	MTHFD2
Tunicamycin	MTHFD2
1-Methyl-4-phenylpyridinium	MTHFD2
Aflatoxin B1	MTHFD2
Air Pollutants	MTHFD2
Carbon Tetrachloride	MTHFD2
Ethinyl Estradiol	MTHFD2
methylmercuric chloride	MTHFD2
Nanotubes, Carbon	MTHFD2
Cisplatin	MTHFD2
Dietary Sucrose	MTHFD2
Estradiol	MTHFD2
Fenretinide	MTHFD2
Oxygen	MTHFD2
Phenobarbital	MTHFD2
pirinixic acid	MTHFD2
Progesterone	MTHFD2
Silicon Dioxide	MTHFD2
Testosterone	MTHFD2
2,2',4,4'-tetrabromodiphenyl ether	MTHFD2
2-methyl-2H-pyrazole-3-carboxylic acid (2-methyl-4-o-tolylazophenyl)amide	MTHFD2
4-(5-benzo(1,3)dioxol-5-yl-4-pyridin-2-yl-1H-imidazol-2-yl)benzamide	MTHFD2
abrine	MTHFD2
Acrylamide	MTHFD2
Asbestos, Crocidolite	MTHFD2
Cadmium Chloride	MTHFD2
Carbamazepine	MTHFD2
Chlorpyrifos	MTHFD2
Copper	MTHFD2
Cuprizone	MTHFD2
Diclofenac	MTHFD2
dorsomorphin	MTHFD2
Dronabinol	MTHFD2
Folic Acid	MTHFD2
Gasoline	MTHFD2
Glucose	MTHFD2
manganese chloride	MTHFD2
Neomycin	MTHFD2
Nickel	MTHFD2
Polycyclic Aromatic Hydrocarbons	MTHFD2
Soot	MTHFD2
T-2 Toxin	MTHFD2
Thapsigargin	MTHFD2
Thioacetamide	MTHFD2
titanium dioxide	MTHFD2
Tobacco Smoke Pollution	MTHFD2
Tretinoin	MTHFD2
Triclosan	MTHFD2
1,2-dibromo-4-(1,2-dibromoethyl)cyclohexane	MTHFD2
1,2-Dimethylhydrazine	MTHFD2
1,3-butadiene	MTHFD2
1,4-bis(2-(3,5-dichloropyridyloxy))benzene	MTHFD2
1-Butanol	MTHFD2
1-methylanthracene	MTHFD2
2-(1'H-indole-3'-carbonyl)thiazole-4-carboxylic acid methyl ester	MTHFD2
2,4-Dichlorophenoxyacetic Acid	MTHFD2
4-(4-((5-(4,5-dimethyl-2-nitrophenyl)-2-furanyl)methylene)-4,5-dihydro-3-methyl-5-oxo-1H-pyrazol-1-yl)benzoic acid	MTHFD2
(4-amino-1,4-dihydro-3-(2-pyridyl)-5-thioxo-1,2,4-triazole)copper(II)	MTHFD2
4-chloro-N-((4-(1,1-dimethylethyl)phenyl)methyl)-3-ethyl-1-methyl-1H-pyrazole-5-carboxamide	MTHFD2
7,8-Dihydro-7,8-dihydroxybenzo(a)pyrene 9,10-oxide	MTHFD2
acetamide	MTHFD2
Amiodarone	MTHFD2
Amitrole	MTHFD2
amphotericin B, deoxycholate drug combination	MTHFD2
Antimycin A	MTHFD2
Antirheumatic Agents	MTHFD2
Arsenic Trioxide	MTHFD2
Artesunate	MTHFD2
Ascorbic Acid	MTHFD2
Atrazine	MTHFD2
Azacitidine	MTHFD2
azaspiracid	MTHFD2
AZM551248	MTHFD2
azoxystrobin	MTHFD2
Benzalkonium Compounds	MTHFD2
Betaine	MTHFD2
beta-methylcholine	MTHFD2
Bexarotene	MTHFD2
bromobenzene	MTHFD2
Bucladesine	MTHFD2
Cellulose	MTHFD2
Cephaloridine	MTHFD2
Chelating Agents	MTHFD2
chloropicrin	MTHFD2
Chloroprene	MTHFD2
Cholesterol, Dietary	MTHFD2
Choline	MTHFD2
Clobetasol	MTHFD2
Copper Sulfate	MTHFD2
coumarin	MTHFD2
Cyclophosphamide	MTHFD2
decamethrin	MTHFD2
deguelin	MTHFD2
deoxynivalenol	MTHFD2
Dexamethasone	MTHFD2
Diethylnitrosamine	MTHFD2
diisobutyl phthalate	MTHFD2
Diquat	MTHFD2
Diuron	MTHFD2
Doxorubicin	MTHFD2
Endosulfan	MTHFD2
entinostat	MTHFD2
Estrone	MTHFD2
Etoposide	MTHFD2
fenpyroximate	MTHFD2
fluoranthene	MTHFD2
Fructose	MTHFD2
Genistein	MTHFD2
Gentamicins	MTHFD2
hexabromocyclododecane	MTHFD2
Hexachlorocyclohexane	MTHFD2
ICG 001	MTHFD2
indole-3-carbinol	MTHFD2
Ivermectin	MTHFD2
K 7174	MTHFD2
Lamivudine	MTHFD2
lard	MTHFD2
lead acetate	MTHFD2
Leflunomide	MTHFD2
Medroxyprogesterone Acetate	MTHFD2
Mercuric Chloride	MTHFD2
Methamphetamine	MTHFD2
Methimazole	MTHFD2
Methionine	MTHFD2
methylarsine oxide	MTHFD2
Methylcholanthrene	MTHFD2
Methylnitrosourea	MTHFD2
Miconazole	MTHFD2
midostaurin	MTHFD2
Mitoxantrone	MTHFD2
mono-(2-ethylhexyl)phthalate	MTHFD2
n-butoxyethanol	MTHFD2
nickel chloride	MTHFD2
nickel monoxide	MTHFD2
Niclosamide	MTHFD2
nonylphenol	MTHFD2
NSC668394	MTHFD2
Paraquat	MTHFD2
PCI 5002	MTHFD2
Pemetrexed	MTHFD2
pentabromodiphenyl ether	MTHFD2
Pentachlorophenol	MTHFD2
perfluorooctane sulfonic acid	MTHFD2
perfluorooctanoic acid	MTHFD2
Phosgene	MTHFD2
phosphinothricin	MTHFD2
picoxystrobin	MTHFD2
Plant Oils	MTHFD2
potassium bromate	MTHFD2
Potassium Dichromate	MTHFD2
Propylthiouracil	MTHFD2
pyrachlostrobin	MTHFD2
pyrimidifen	MTHFD2
quinoline	MTHFD2
Resveratrol	MTHFD2
riddelliine	MTHFD2
Rotenone	MTHFD2
S-(1,2-dichlorovinyl)cysteine	MTHFD2
schizandrin B	MTHFD2
Silver	MTHFD2
sinapinic acid	MTHFD2
Smoke	MTHFD2
Sodium Selenite	MTHFD2
Sulfadimethoxine	MTHFD2
Sulindac	MTHFD2
sulindac sulfide	MTHFD2
Sunitinib	MTHFD2
Tamoxifen	MTHFD2
Temozolomide	MTHFD2
Tetrachloroethylene	MTHFD2
thifluzamide	MTHFD2
Trichloroethylene	MTHFD2
trimellitic anhydride	MTHFD2
triptonide	MTHFD2
tris(1,3-dichloro-2-propyl)phosphate	MTHFD2
trovafloxacin	MTHFD2
Vehicle Emissions	MTHFD2
vinclozolin	MTHFD2
vinylidene chloride	MTHFD2
Zidovudine	MTHFD2
Zinc	MTHFD2
pirinixic acid	PDSS1
bisphenol A	PDSS1
Estradiol	PDSS1
Acetaminophen	PDSS1
Cyclosporine	PDSS1
Tetrachlorodibenzodioxin	PDSS1
Valproic Acid	PDSS1
1,2-Dimethylhydrazine	PDSS1
arsenite	PDSS1
Benzo(a)pyrene	PDSS1
Calcitriol	PDSS1
Carbon Tetrachloride	PDSS1
Cisplatin	PDSS1
Coumestrol	PDSS1
Folic Acid	PDSS1
GW 4064	PDSS1
Hydrogen Peroxide	PDSS1
Lipopolysaccharides	PDSS1
Nanotubes, Carbon	PDSS1
Oleic Acid	PDSS1
Oxygen	PDSS1
Piroxicam	PDSS1
sodium arsenite	PDSS1
Testosterone	PDSS1
Thioacetamide	PDSS1
4-(4-((5-(4,5-dimethyl-2-nitrophenyl)-2-furanyl)methylene)-4,5-dihydro-3-methyl-5-oxo-1H-pyrazol-1-yl)benzoic acid	PDSS1
4-hydroxy-2-nonenal	PDSS1
6-(4-chlorophenyl)imidazo(2,1-b)(1,3)thiazole-5-carbaldehyde O-(3,4-dichlorobenzyl)oxime	PDSS1
7,8-Dihydro-7,8-dihydroxybenzo(a)pyrene 9,10-oxide	PDSS1
afuresertib	PDSS1
Air Pollutants	PDSS1
Amiodarone	PDSS1
Atrazine	PDSS1
bis(4-hydroxyphenyl)sulfone	PDSS1
Carbonyl Cyanide p-Trifluoromethoxyphenylhydrazone	PDSS1
Chlorpyrifos	PDSS1
Choline	PDSS1
cobaltous chloride	PDSS1
Copper	PDSS1
Copper Sulfate	PDSS1
decamethrin	PDSS1
Dieldrin	PDSS1
Doxorubicin	PDSS1
Farnesol	PDSS1
Gentamicins	PDSS1
ICG 001	PDSS1
jinfukang	PDSS1
Magnetite Nanoparticles	PDSS1
Methionine	PDSS1
Nickel	PDSS1
NSC 689534	PDSS1
Ovalbumin	PDSS1
Ozone	PDSS1
pentabromodiphenyl ether	PDSS1
Resveratrol	PDSS1
Rotenone	PDSS1
S-(1,2-dichlorovinyl)cysteine	PDSS1
Silicon Dioxide	PDSS1
Soot	PDSS1
Succimer	PDSS1
Tamoxifen	PDSS1
Thapsigargin	PDSS1
Tretinoin	PDSS1
Trichloroethylene	PDSS1
trichostatin A	PDSS1
trimellitic anhydride	PDSS1
triptonide	PDSS1
tris(1,3-dichloro-2-propyl)phosphate	PDSS1
Tunicamycin	PDSS1
Urethane	PDSS1
Vehicle Emissions	PDSS1
